# Supplementary material for: A DRD1 Polymorphism Predisposes to Lung Cancer among Those Exposed to Secondhand Smoke during Childhood
Source: Oxford University Press journal article supplement (doi:10.1158/1940-6207.capr-14-0158), 2014-10-04
Supplement: 19406207capr140158-sup-131671_2_supp_2660755_nbyn2s.doc [file 19406207capr140158-sup-131671_2_supp_2660755_nbyn2s.doc]

| **Supplementary Table 2: SNP Selection** | | | |  |  |  |  |  |  |  |  |  |
| --- | --- | --- | --- | --- | --- | --- | --- | --- | --- | --- | --- | --- |
|  |  |  |  |  |  |  |  |  |  |  |  |  |
| **Genotyped** | **MAF** | **Gene** | **SNPID** | **Proposed miR** | **Site** |  |  | **Patrocles** | **SNPInfo** | **PolymiRTS** | **Selected** |  |
|  | Unknown | CHRNA1 | rs4524097 | Unknown | 8-mer | C/G |  | Yes | Yes | Yes | No |  |
| Yes | >5% | CHRNA2 | rs2292975 | Unknown | 8-mer | G/T |  | Yes | Yes | Yes | Yes |  |
|  | <5% | CHRNA4 | rs45508092 | miR-324-5p | 8-mer | C/T | Derived Allele | Yes | Yes | No | No |  |
|  | <5% | CHRNA4 | rs41283006 | miR-485-5p | 8-mer | G/A | Derived Allele | Yes | Yes | No | No |  |
|  | 5% ** | CHRNA4 | rs41283008 | miR-324-3p | 8-mer | G/A | Derived Allele | Yes | Yes | No | No |  |
| Yes | >5% | CHRNA4 | rs4809294 | miR-486-3p | 8-mer | C/T | Derived Allele | Yes | Yes | No | Yes |  |
|  | >10% | CHRNA9 | rs4861327* | miR-659 | 8-mer | T/A | Derived Allele | Yes | Yes | Yes | Yes |  |
|  | Unknown | CHRNB2 | rs1126885 | miR-1207-5p | 8-mer | T/A | Ancestral Allele | Yes | Yes | No | No |  |
|  | Unknown | CHRNB2 | rs34019399 | Unknown | 8-mer | C/T |  | Yes | Yes | Yes | No |  |
|  | Unknown | CHRNB2 | rs35522129 | miR-361-3p | 8-mer | C/- | Ancestral Allele | Yes | No | No | No |  |
|  | Unknown | CHRNB2 | rs1139339 | miR-587 | 8-mer | T/G | Derived Allele | Yes | Yes | No | No |  |
| Yes | >5% | DRD1 | rs686 | miR-504 | 8-mer | A/G | Ancestral Allele | Yes | Yes | Yes | Yes |  |
|  |  |  |  |  |  |  |  |  |  |  |  |  |
|  |  |  |  |  |  |  |  |  |  |  |  |  |
| * rs4861327 was selected for genotyping but the assay design for this SNP was not successful and therefore it was not genotyped in the case control study. | | | | | | | | | | | | |
| MAF denotes minor allele frequency | | |  |  |  |  |  |  |  |  |  |  |

** Rs4123006 had a MAF of 5%, but when comparing the G to the A allele for putative miR-485-3p binding using RNA-Hybrid, there was only a minor alteration in thermodynamics (0.7 Kcal/mol) and therefore the SNP was not further studied.
