# Supplementary material for: A DRD1 Polymorphism Predisposes to Lung Cancer among Those Exposed to Secondhand Smoke during Childhood
Source: Oxford University Press journal article supplement (doi:10.1158/1940-6207.capr-14-0158), 2014-10-04
Supplement: 19406207capr140158-sup-131671_2_supp_2660758_nbyn2s.doc [file 19406207capr140158-sup-131671_2_supp_2660758_nbyn2s.doc]

| **Supplementary Table 5: Main unadjusted effects of smoking, childhood and adult exposure to tobacco smoke and lung cancer risk** | | | | | | | | | |
| --- | --- | --- | --- | --- | --- | --- | --- | --- | --- |
|  |  |  |  |  |  |  |  |  |  |
|  |  |  |  |  |  |  |  |  |  |
| **Gene** |  | **Controls** | **Cases** | **OR** | **LCI** | **-** | **UCI** | ***P*-value** |  |
|  |  |  |  |  |  |  |  |  |  |
|  |  |  |  |  |  |  |  |  |  |
| **Childhood** | Not exposed | 548 (36%) | 412 (30%) | 1 (referent) | | | | |  |
|  | Exposed | 986 (64%) | 967 (70%) | 1.30 | 1.12 | - | 1.52 | **0.001** |  |
|  |  |  |  |  |  |  |  |  |  |
| **Adulthood** | Not exposed | 693 (45%) | 441 (32%) | 1 (referent) | | | | |  |
|  | Exposed | 841 (55%) | 939 (68%) | 1.75 | 1.51 | - | 2.04 | **<0.0001** |  |
|  |  |  |  |  |  |  |  |  |  |
| **Smoking** | Never | 789 (51%) | 416 (61%) | 1 (referent) | | | | |  |
|  | Ever | 747 (49%) | 953 (69%) | 2.40 | 2.06 | - | 2.80 | **<0.0001** |  |
|  |  |  |  |  |  |  |  |  |  |
|  |  |  |  |  |  |  |  |  |  |
|  |  |  |  |  |  |  |  |  |  |
| LCI denotes lower confidence interval, UCI denotes upper confidence interval | | | | | | | |  |  |
| OR denotes Odds Ratio | |  |  |  |  |  |  |  |  |
