# Supplementary material for: A DRD1 Polymorphism Predisposes to Lung Cancer among Those Exposed to Secondhand Smoke during Childhood
Source: Oxford University Press journal article supplement (doi:10.1158/1940-6207.capr-14-0158), 2014-10-04
Supplement: 19406207capr140158-sup-131671_2_supp_2660759_nbyn2s.doc [file 19406207capr140158-sup-131671_2_supp_2660759_nbyn2s.doc]

| **Supplementary Table 6: Association between rs4809294 and rs2292975 and lung cancer risk stratified by exposure to secondhand smoke during adulthood in the NCI-MD Cohort (European Americans)** | | | | | | | | | | | | | | | | | | | | | | | | |
| --- | --- | --- | --- | --- | --- | --- | --- | --- | --- | --- | --- | --- | --- | --- | --- | --- | --- | --- | --- | --- | --- | --- | --- | --- |
|  |  |  |  |  |  |  |  |  |  |  |  |  |  |  |  |  |  |  |  |  |  |  |  |  |
|  |  |  |  |  |  |  |  |  |  |  |  |  |  |  |  |  |  |  |  |  |  |  |  |  |
|  | **Un-stratified** | | | | | | |  | **Unexposed to SHS During Adulthood** | | | | | | |  | **Exposed to SHS During Adulthood** | | | | | | |  |
| **Gene** | **Control** | **Case** | **OR** | **LCI** | **-** | **UCI** | ***P*-value** |  | **Control** | **Case** | **OR** | **LCI** | **-** | **UCI** | ***P*-value** |  | **Control** | **Case** | **OR** | **LCI** | **-** | **UCI** | ***P*-value** |  |
|  |  |  |  |  |  |  |  |  |  |  |  |  |  |  |  |  |  |  |  |  |  |  |  |  |
| **rs4809294** | 276 | 281 | 0.63 | 0.35 | - | 1.12 | 0.113 |  | 73 | 46 | 0.25 | 0.03 | - | 2.22 | 0.213 |  | 203 | 234 | 0.49 | 0.24 | - | 1.04 | 0.063 |  |
|  |  |  |  |  |  |  |  |  |  |  |  |  |  |  |  |  |  |  |  |  |  |  |  |  |
| **rs2292975** | 275 | 276 | 1.02 | 0.81 | - | 1.29 | 0.858 |  | 73 | 45 | 0.67 | 0.37 | - | 1.26 | 0.219 |  | 202 | 230 | 0.98 | 0.72 | - | 1.35 | 0.913 |  |
|  |  |  |  |  |  |  |  |  |  |  |  |  |  |  |  |  |  |  |  |  |  |  |  |  |
|  |  |  |  |  |  |  |  |  |  |  |  |  |  |  |  |  |  |  |  |  |  |  |  |  |
| *Adjusted for age, gender (male vs female), smoking status (never/ever), secondhand adult smoking exposure (no/yes) & pack-years | | | | | | | | | | | | | | | | | | |  |  |  |  |  |  |
| OR denotes odds ratio, 1df test, UCI, upper confidence limit, LCI, lower confidence limit | | | | | | | | | | | |  |  |  |  |  |  |  |  |  |  |  |  |  |
