# Supplementary material for: A DRD1 Polymorphism Predisposes to Lung Cancer among Those Exposed to Secondhand Smoke during Childhood
Source: Oxford University Press journal article supplement (doi:10.1158/1940-6207.capr-14-0158), 2014-10-04
Supplement: 19406207capr140158-sup-131671_2_supp_2660763_nbyn2s.doc [file 19406207capr140158-sup-131671_2_supp_2660763_nbyn2s.doc]

**Supplementary Methods**

**Genotyping**

**NCI-MD Case-Control Study** Genomic DNA was isolated from buffy coat samples containing white blood cells using Flexigene DNA Kit (Qiagen) according to the manufacturer's instructions. Three hundred and twenty-one cases and 322 population controls were initially genotyped for the 3 SNPs. Ten percent of samples were included as duplicates. Duplicates, which included both cases and controls, were blinded, randomly distributed and included on each assay plate. The genotype concordance for each SNP was at least 99% among duplicates and completion rates were >95%. Genotyping was completed at BioServe (Beltsville, MD) using the iPlexGold assay (Sequenom, San Diego, CA). Additional genotyping for rs686 was completed on 344 cases and 452 controls using a custom Taqman assay (Applied Biosystems, Foster City, CA) according to the supplier's instructions. Therefore, a total of 665 cases and 774 population controls from the NCI-MD study were included. The genotyping success rates for rs686 were 98.8% and 99% using iPlexGold and Taqman assays, respectively.

**Mayo Clinic Study** Genomic DNA was isolated from buffy coat samples containing white blood cells using Flexigene DNA Kit (Qiagen) according to the manufacturer's instructions. Genotyping for rs686 was completed using a custom Taqman assay (Applied Biosystems, Foster City, CA) according to the supplier's instructions on the Fluidigm platform. Five percent of samples were analysed in duplicate of which the concordance was 100%. The genotyping success rate for rs686 using Taqman assay was 97.6%

**EXHALE Study at Wayne State University** Genomic DNA was isolated from either whole blood using Qiagen EZ1 advanced magnetic bead technology under the “Purification of DNA from Whole Blood” protocol, the EZ1 DNA Blood Card, and the EZ1 DNA Blood 350ul Kit or DNA was isolated from saliva samples using Oragene kits with the Gentra Puregene Kit following the manufacturer’s protocols. Genotyping for rs686 was completed on using a custom Taqman assay (Applied Biosystems, Foster City, CA) according to the supplier's instructions. Duplicate samples (15%) were included and randomized as described above for the NCI study. Concordance was 100%. The genotyping success rate for rs686 using Taqman assay was 96.7%
